# Supplementary material
Source: PubMed Central journal article supplement (PMC9638873)
Supplement: EMBR-23-e54910-s001.pdf [file EMBR-23-e54910-s001.pdf]

## Expanded View Figures

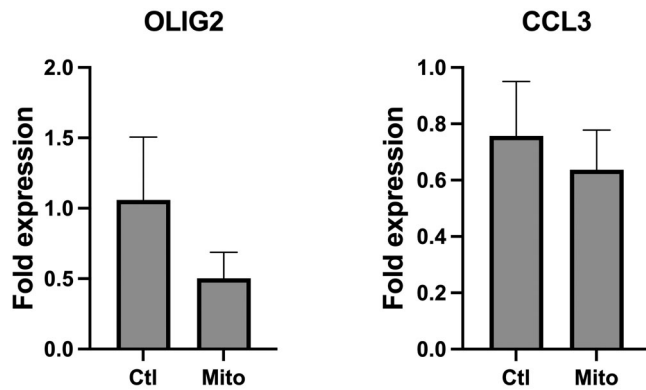**Figure EV1. Validation of the transcriptomic analysis by qPCR.**

Transcript levels of oligodendrocyte transcription factor 2 (OLIG2) and the C–C motif chemokine ligand 3 (CCL3) in PMNL incubated with platelet-derived mitochondria (Mito) or absence (Ctl) were assessed by qRT-PCR. Results are expressed as the mean  $\pm$  SEM of three biological replicates, each performed in three technical replicates. A paired sample *t*-test was performed to determine *P*-values of 0.1711 (OLIG2) and 0.4504 (CCL3).

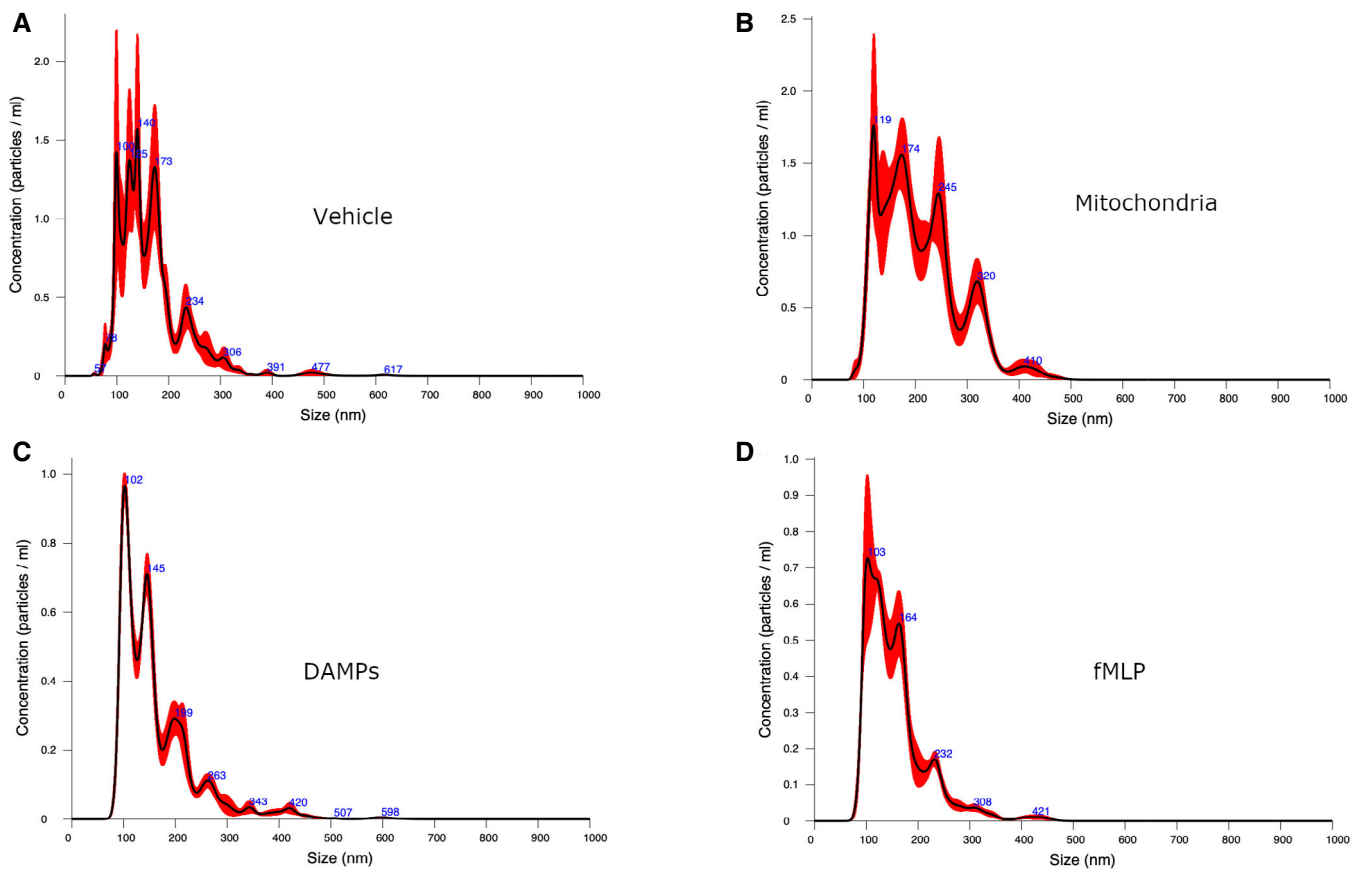**Figure EV2.**

◀ **Figure EV2. Sizing of the vesicles released from PMN.**

A–D PMN-MVs sizing by nanoparticles tracking analysis (Nanosight) of the supernatant of PMN incubated with either the vehicle (HBSS, panel A), platelet-derived mitochondria (panel B), platelet-derived DAMPs (panel C) or fMLP (panel D). Data shown are representative of three biological replicates. The size distribution and concentration of MVs from PMN supernatant were measured using NanosightNS300 (Malvern Panalytical). Sample were prepared for nanoparticle tracking analysis by diluting the stock material in particle-free water until the concentration was between  $1 \times 10^8$  and  $1 \times 10^9$  particles/ml and six videos of 30 s were captured. At least two different dilutions resulting from the stock concentration were analyzed for each sample. The screen gain was set to 10 and the camera level to 16. After capture, the videos were analyzed by the Nanosight Software v3.2 with a detection threshold of 5.

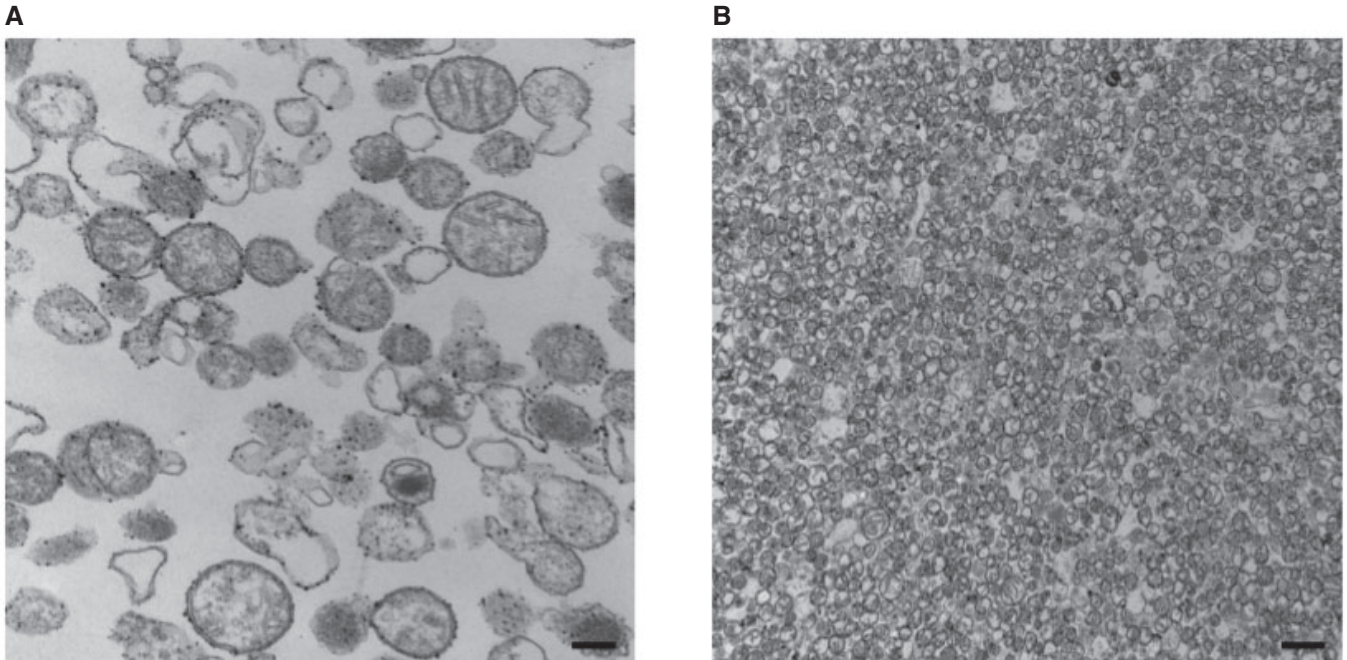

**Figure EV3. Visualization of platelet-derived mitochondria.**

A, B Transmission electron microscopy imaging of our mitochondria preparation and purification as previously reported (Léger et al, 2020, 2021). The black scale bars shown in the lower right of panels (A) and (B) represent sizes of 200 nm and 1  $\mu$ m, respectively.
