# Supplementary material
Source: PubMed Central journal article supplement (PMC9638873)
Supplement: EMBR-23-e54910-s005.pdf [file EMBR-23-e54910-s005.pdf]

## Appendix

|                        |   |
|------------------------|---|
| Appendix Table S1..... | 2 |
| Appendix Table S2..... | 3 |

**Appendix Table S1.** Modulation of mitochondrial gene expression in human polymorphonuclear neutrophils, in 4 biological experiments, by functional platelet-derived mitochondria (Mito) or mitochondrial DAMPs and compared to the control (PMN incubated with HBSS). (FC=fold change)

| Mito vs control |       | DAMPs vs control |       |
|-----------------|-------|------------------|-------|
| Gene            | logFC | Gene             | logFC |
| MT-RNR1         | 2.68  | MT-ND4L          | 1.44  |
| MT-ND6          | 1.77  | MT-ATP8          | 1.22  |
| MT-ATP8         | 1.71  | MT-ATP6P1        | 1.16  |
| MT-ND3          | 1.34  | MT-ND1           | 1.11  |
| MT-ATP6P1       | 1.3   | MT-ND5           | 1.1   |
| MT-ATP6         | 1.23  | MT-ATP6          | 1.01  |
| MT-ND1          | 1.1   | MT-ND4           | 0.95  |
| MT-ND5          | 1.06  | MT-ND2           | 0.94  |
| MT-ND4          | 0.96  |                  |       |
| MT-ND2          | 0.87  |                  |       |
| MT-ND4L         | 0.71  |                  |       |
| MT-CYB          | 0.7   |                  |       |
| MT-CO2          | 0.68  |                  |       |
| MT-CO3          | 0.54  |                  |       |
| MT-ND5P32       | 0.53  |                  |       |
| MT-CYBP23       | 0.43  |                  |       |

**Appendix Table S2.** Modulation of non-mitochondrial gene expression in human polymorphonuclear neutrophils, in 4 biological experiments, by functional platelet-derived mitochondria (Mito) or mitochondrial DAMPs and compared to the control (polymorphonuclear neutrophils incubated with HBSS). (FC=fold change)

| Mito vs Ctl |       | DAMPs vs Ctl |       |
|-------------|-------|--------------|-------|
| Gene        | logFC | Gene         | logFC |
| SVIL2P      | 2.57  | RNY1         | 1.08  |
| CEP290      | 1.33  | RNU4-1       | 1.08  |
| ZNF804A     | 1.20  | RNU4-2       | 0.89  |
| TMEM92-AS1  | 1.01  | HIC1         | 0.81  |
| MAGOH       | 0.81  | TIPARP       | 0.70  |
| SPDYA       | 0.77  | USP36        | 0.60  |
| CHMP4BP1    | 0.76  |              |       |
| TPM4        | 0.72  |              |       |
| BCAS2       | 0.68  |              |       |
| MIR4453HG   | 0.67  |              |       |
| GNG5        | 0.64  |              |       |
| TGM2        | 0.64  |              |       |
| DNTTIP2     | 0.55  |              |       |
| HCG18       | 0.54  |              |       |
| USP36       | 0.49  |              |       |
| TRPM2       | 0.49  |              |       |
| MIR9-1HG    | 0.47  |              |       |
| EML2        | 0.46  |              |       |
| SYAP1       | 0.44  |              |       |
| RPGR        | 0.42  |              |       |
| CHMP2A      | 0.36  |              |       |
| CCL3L1      | -0.40 |              |       |
| RHOB        | -0.40 |              |       |
| SCARNA5     | -0.41 |              |       |
| SLC25A5     | -0.47 |              |       |
| CCL3        | -0.49 |              |       |
| OLIG1       | -0.50 |              |       |
| FBXL15      | -0.50 |              |       |
| RNU5B-1     | -0.54 |              |       |
| LGALS1      | -0.61 |              |       |
| RTN1        | -0.66 |              |       |
| ICAM5       | -0.68 |              |       |
| CEBPE       | -0.81 |              |       |
