# Supplementary material
Source: PubMed Central journal article supplement (PMC9638873)

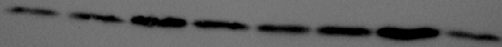

COX IV labeling Figure 1G

\_\_\_\_\_

Supplement: EMBR-23-e54910-s002.pdf [file EMBR-23-e54910-s002.pdf]
